# Supplementary material
Source: publisher figshare collection journal article supplement (https://tandf.figshare.com/articles/dataset/_/5537752)
Supplement: Supplementary file 1 [file 1]

Table S1. The experiments carried out, their numbering and conditions.

| <i>Experiment code<br/>(Series 1/Series 2*)</i> | <i>Temperature<br/>(°C)</i> | <i>Slag<br/>type</i> | <i>Oxygen partial pressure<br/>(atm)</i> | <i>Crucible<br/>material</i> |
|-------------------------------------------------|-----------------------------|----------------------|------------------------------------------|------------------------------|
| MV12e/MV37                                      | 1150                        | A                    | 0.5                                      | SiO <sub>2</sub>             |
| MV13e/MV38                                      | 1150                        | A                    | 0.2                                      | SiO <sub>2</sub>             |
| MV18, MV18e/MV51                                | 1150                        | A                    | 0.01                                     | SiO <sub>2</sub>             |
| MV17, MV17e/MV48                                | 1150                        | A                    | 0.0001                                   | SiO <sub>2</sub>             |
| MV28/MV40                                       | 1150                        | B                    | 0.5                                      | MgO                          |
| MV14/MV41                                       | 1150                        | B                    | 0.2                                      | MgO                          |
| MV19/MV52                                       | 1150                        | B                    | 0.01                                     | MgO                          |
| MV29/MV49                                       | 1150                        | B                    | 0.0001                                   | MgO                          |
| MV30/MV42                                       | 1150                        | C                    | 0.5                                      | MgO                          |
| MV31/MV43                                       | 1150                        | C                    | 0.2                                      | MgO                          |
| MV20/MV53                                       | 1150                        | C                    | 0.01                                     | MgO                          |
| MV32/MV50                                       | 1150                        | C                    | 0.0001                                   | MgO                          |
| MV35/MV58                                       | 1000                        | B                    | 0.5                                      | MgO                          |
| MV22/MV55                                       | 1000                        | B                    | 0.01                                     | MgO                          |
| MV34, MV34e/MV45                                | 1000                        | A                    | 0.5                                      | SiO <sub>2</sub>             |
| MV23, MV23e/MV54                                | 1000                        | A                    | 0.01                                     | SiO <sub>2</sub>             |
| MV27/MV46                                       | 1300                        | A                    | 0.5                                      | SiO <sub>2</sub>             |
| MV24/MV56                                       | 1300                        | A                    | 0.01                                     | SiO <sub>2</sub>             |
| MV26/MV47                                       | 1300                        | B                    | 0.5                                      | MgO                          |
| MV25/MV57                                       | 1300                        | B                    | 0.01                                     | MgO                          |

\*e in table S2 refers to extended experiments with (16) or 32 hours equilibration time
