# Supplementary material
Source: publisher figshare collection journal article supplement (https://tandf.figshare.com/articles/dataset/_/5537752)
Supplement: Supplementary file 2 [file 1]

Table S3: The primary LA-ICP-MS data (ppm)

Aver  $\pm$ StDev

Series 1:

| Element | MV12           | MV13             | MV14           | MV17          | MV18            | MV19          | MV20          | MV22            | MV23           | MV24          |
|---------|----------------|------------------|----------------|---------------|-----------------|---------------|---------------|-----------------|----------------|---------------|
| Rh103   | 27.1 $\pm$ 7.8 | 85.9 $\pm$ 21.3  | 62.3 $\pm$ 0.9 | 4.6 $\pm$ 1.6 | 13.7 $\pm$ 1.6  | 8.6 $\pm$ 0.2 | 8.9 $\pm$ 0.7 | 20.6 $\pm$ 5.3  | 26.4 $\pm$ 6.2 | 6.7 $\pm$ 3.1 |
| Pd108   | 19.1 $\pm$ 6.4 | 38.2 $\pm$ 14.4  | 7.4 $\pm$ 4.0  | 7.7 $\pm$ 4.4 | 10.8 $\pm$ 13.8 | 1.1 $\pm$ 0.2 | 1.8 $\pm$ 1.2 | 16.1 $\pm$ 38.3 | 9.5 $\pm$ 7.2  | 0.8 $\pm$ 0.6 |
| Au197   | 7.9 $\pm$ 1.8  | 70.6 $\pm$ 100.1 | 4.8 $\pm$ 5.4  | 2.0 $\pm$ 1.3 | 11.7 $\pm$ 14.9 | 0.7 $\pm$ 0.1 | 2.4 $\pm$ 3.3 | 21.3 $\pm$ 59.5 | 2.6 $\pm$ 1.4  | 3.4 $\pm$ 1.4 |

Series 2:

| Element | MV37            | MV38            | MV40           | MV41           | MV42            | MV43           | MV45             | MV46           | MV47           | MV48          |
|---------|-----------------|-----------------|----------------|----------------|-----------------|----------------|------------------|----------------|----------------|---------------|
| Rh103   | 85.3 $\pm$ 15.4 | 59.0 $\pm$ 15.4 | 89.3 $\pm$ 5.9 | 62.1 $\pm$ 3.8 | 87.0 $\pm$ 19.6 | 56.3 $\pm$ 3.5 | 153.8 $\pm$ 46.7 | 21.6 $\pm$ 9.7 | 99.0 $\pm$ 6.1 | 9.0 $\pm$ 8.8 |
| Pd108   | 36.4 $\pm$ 33.3 | 55.4 $\pm$ 38.1 | 12.8 $\pm$ 8.1 | 4.7 $\pm$ 1.5  | 11.2 $\pm$ 6.3  | 7.3 $\pm$ 3.2  | 54.8 $\pm$ 32.3  | 8.4 $\pm$ 5.7  | 1.7 $\pm$ 0.5  | 9.7 $\pm$ 3.8 |
| Au197   | 77.4 $\pm$ 98.2 | 127 $\pm$ 136   | 6.5 $\pm$ 6.8  | 2.4 $\pm$ 1.7  | 12.0 $\pm$ 15.5 | 6.2 $\pm$ 4.1  | 59.2 $\pm$ 86.7  | 7.4 $\pm$ 2.8  | 0.4 $\pm$ 0.2  | 5.1 $\pm$ 3.8 |

| MV25          | MV26           | MV27           | MV28           | MV29           | MV30           | MV31           | MV32          | MV34            | MV35            |
|---------------|----------------|----------------|----------------|----------------|----------------|----------------|---------------|-----------------|-----------------|
| 8.0 $\pm$ 0.6 | 75.6 $\pm$ 2.7 | 14.3 $\pm$ 6.1 | 93.4 $\pm$ 5.3 | 0.6 $\pm$ 0.3  | 80.6 $\pm$ 4.7 | 51.6 $\pm$ 6.1 | 0.7 $\pm$ 0.2 | 97.0 $\pm$ 57.7 | 399.2 $\pm$ 253 |
| 0.6 $\pm$ 0.1 | 5.0 $\pm$ 0.6  | 12.6 $\pm$ 3.9 | 5.8 $\pm$ 3.3  | 0.2 $\pm$ 0.1  | 11.0 $\pm$ 5.7 | 4.5 $\pm$ 3.2  | 0.3 $\pm$ 0.1 | 38.9 $\pm$ 26.0 | 54.2 $\pm$ 99.0 |
| 0.3 $\pm$ 0.1 | 1.9 $\pm$ 0.2  | 8.4 $\pm$ 3.3  | 4.9 $\pm$ 7.2  | 0.1 $\pm$ 0.04 | 7.5 $\pm$ 6.2  | 2.7 $\pm$ 2.8  | 0.2 $\pm$ 0.1 | 24.8 $\pm$ 20.1 | 66 $\pm$ 145    |

| MV49          | MV50           | MV51            | MV52          | MV53          | MV54           | MV55           | MV56            | MV57           | MV58          |
|---------------|----------------|-----------------|---------------|---------------|----------------|----------------|-----------------|----------------|---------------|
| 0.6 $\pm$ 0.1 | 0.7 $\pm$ 0.02 | 11.8 $\pm$ 1.8  | 7.5 $\pm$ 0.6 | 7.9 $\pm$ 0.1 | 17.7 $\pm$ 5.2 | 17.7 $\pm$ 2.1 | 13.6 $\pm$ 9.3  | 6.9 $\pm$ 0.7  | 685 $\pm$ 582 |
| 0.4 $\pm$ 0.1 | 0.3 $\pm$ 0.1  | 16.1 $\pm$ 21.4 | 1.9 $\pm$ 0.5 | 1.8 $\pm$ 0.5 | 6.4 $\pm$ 4.5  | 7.1 $\pm$ 12.4 | 12.1 $\pm$ 16.1 | 0.3 $\pm$ 0.1  | 8.2 $\pm$ 4.4 |
| 0.2 $\pm$ 0.1 | 0.2 $\pm$ 0.1  | 44.7 $\pm$ 124  | 0.6 $\pm$ 0.2 | 0.7 $\pm$ 0.4 | 16.0 $\pm$ 47  | 1.8 $\pm$ 3.5  | 10.7 $\pm$ 14.1 | 0.1 $\pm$ 0.01 | 2.2 $\pm$ 2.2 |
