# Supplementary material
Source: publisher figshare collection journal article supplement (https://tandf.figshare.com/articles/dataset/_/5537752)
Supplement: Supplementary file 3 [file 1]

Table 2S. The primary EPMA data of the silver alloy and slag (wt-%)

Series 1 - Metal phase:

| Aver<br>±StDev | MV12e       | MV12e(16 h) | MV13e       | MV13e(16h)  | MV14        | MV17        | MV17e       | MV18        | MV18e       | MV19        |
|----------------|-------------|-------------|-------------|-------------|-------------|-------------|-------------|-------------|-------------|-------------|
| O              | 1.16 ±0.21  | 1.16 ±0.27  | 1.29 ±0.21  | 1.39 ±0.18  | 0.93 ±0.21  | 0.88 ±0.14  | 1.06 ±0.27  | 1.02 ±0.28  | 1.26 ±0.32  | 1.09 ±0.21  |
| Cu             | 0.02 ±0.01  | 0.02 ±0.01  | 0.06 ±0.01  | 0.01 ±0.004 | 0.04 ±0.02  | 0.69 ±0.13  | 0.29 ±0.07  | 0.11 ±0.03  | 0.05 ±0.01  | 0.08 ±0.04  |
| Rh             | 0.08 ±0.02  | 0.09 ±0.02  | 0.09 ±0.02  | 0.07 ±0.01  | 0.13 ±0.09  | 0.12 ±0.01  | 0.07 ±0.02  | 0.10 ±0.02  | 0.07 ±0.01  | 0.08 ±0.02  |
| Pd             | 0.58 ±0.07  | 0.56 ±0.04  | 0.61 ±0.05  | 0.66 ±0.06  | 0.66 ±0.21  | 1.36 ±0.50  | 0.53 ±0.04  | 1.06 ±0.18  | 0.57 ±0.04  | 1.16 ±0.53  |
| Ag             | 95.79 ±0.48 | 95.72 ±0.27 | 95.48 ±0.38 | 97.11 ±0.36 | 96.45 ±0.63 | 94.66 ±0.72 | 95.04 ±1.28 | 96.04 ±0.55 | 97.46 ±0.30 | 96.28 ±0.75 |
| Au             | 0.60 ±0.04  | 0.57 ±0.04  | 0.52 ±0.06  | 0.72 ±0.04  | 0.74 ±0.10  | 0.82 ±0.18  | 0.54 ±0.07  | 0.78 ±0.11  | 0.62 ±0.04  | 0.67 ±0.16  |
| Te             | 0.11 ±0.01  | 0.11 ±0.01  | 0.11 ±0.01  | 0.11 ±0.01  | 0.01 ±0.01  | 0.89 ±0.33  | 0.39 ±0.08  | 0.17 ±0.15  | 0.23 ±0.02  | 0.03 ±0.03  |

| MV20        | MV22        | MV23        | MV23e       | MV24        | MV25        | MV26        | MV27        |
|-------------|-------------|-------------|-------------|-------------|-------------|-------------|-------------|
| 1.06 ±0.16  | 1.16 ±0.15  | 1.33 ±0.25  | 1.59 ±0.58  | 1.38 ±0.19  | 0.53 ±0.29  | 2.00 ±0.32  | 1.61 ±0.25  |
| 0.08 ±0.03  | 0.03 ±0.02  | 0.09 ±0.03  | 0.03 ±0.01  | 0.21 ±0.11  | 0.34 ±0.12  | 0.11 ±0.05  | 0.10 ±0.02  |
| 0.12 ±0.03  | 0.04 ±0.02  | 0.03 ±0.01  | 0.03 ±0.01  | 0.19 ±0.03  | 0.40 ±0.49  | 0.65 ±0.14  | 0.19 ±0.02  |
| 1.00 ±0.27  | 1.19 ±0.31  | 0.97 ±0.26  | 0.52 ±0.02  | 1.18 ±0.20  | 2.04 ±0.25  | 2.54 ±0.21  | 1.42 ±0.05  |
| 96.36 ±0.49 | 96.30 ±0.34 | 96.40 ±0.18 | 96.23 ±0.46 | 95.55 ±0.36 | 95.00 ±0.56 | 93.15 ±0.21 | 95.29 ±0.45 |
| 0.55 ±0.12  | 0.66 ±0.18  | 0.47 ±0.10  | 0.56 ±0.03  | 0.66 ±0.13  | 0.88 ±0.13  | 0.87 ±0.10  | 0.63 ±0.20  |
| 0.02 ±0.03  | 0.008 ±0.01 | 0.09 ±0.09  | 0.17 ±0.02  | 0.42 ±0.49  | 0.06 ±0.06  | 0.01 ±0.02  | 0.19 ±0.03  |

| MV28        | MV29       | MV30        | MV31        | MV32        | MV34        | MV34e       | MV35        |
|-------------|------------|-------------|-------------|-------------|-------------|-------------|-------------|
| 1.75 ±0.16  | 1.66 ±0.15 | 1.53 ±0.35  | 0.89 ±0.19  | 1.69 ±0.22  | 1.20 ±0.24  | 0.92 ±0.15  | 1.53 ±0.26  |
| 0.06 ±0.02  | 1.56 ±0.33 | 0.03 ±0.01  | 0.02 ±0.02  | 0.54 ±0.15  | 0.06 ±0.02  | 0.02 ±0.01  | 0.04 ±0.02  |
| 0.17 ±0.03  | 0.10 ±0.01 | 0.15 ±0.03  | 0.10 ±0.01  | 0.07 ±0.02  | 0.05 ±0.01  | 0.05 ±0.01  | 0.03 ±0.01  |
| 1.28 ±0.06  | 1.38 ±0.05 | 1.64 ±0.12  | 1.41 ±0.08  | 0.88 ±0.04  | 1.04 ±0.06  | 0.72 ±0.05  | 1.05 ±0.07  |
| 95.31 ±0.15 | 93.1 ±0.47 | 95.33 ±0.27 | 96.15 ±0.38 | 95.27 ±0.44 | 96.46 ±0.22 | 96.77 ±0.49 | 96.15 ±0.25 |
| 0.56 ±0.14  | 0.65 ±0.17 | 0.77 ±0.22  | 0.74 ±0.13  | 0.39 ±0.18  | 0.42 ±0.15  | 0.75 ±0.05  | 0.38 ±0.23  |
| 0.01 ±0.02  | 0.83 ±0.09 | 0.02 ±0.02  | 0.02 ±0.01  | 0.65 ±0.08  | 0.01 ±0.02  | 0.12 ±0.01  | 0.01 ±0.01  |

Series 1 - Slag phase:

Average

| ±StDev | MV12e       | MV12e(16 h) | MV13e       | MV13e(16 h) | MV14        | MV17        | MV17e       | MV18        | MV18e       | MV19        |
|--------|-------------|-------------|-------------|-------------|-------------|-------------|-------------|-------------|-------------|-------------|
| O      | 41.54 ±0.51 | 40.82 ±0.58 | 42.44 ±0.67 | 40.02 ±0.50 | 42.81 ±0.67 | 47.19 ±0.43 | 42.28 ±0.35 | 46.03 ±0.86 | 43.41 ±0.55 | 42.17 ±0.49 |
| Na     | 9.59 ±0.19  | 9.97 ±0.38  | 10.13 ±0.20 | 10.22 ±0.33 | 16.46 ±0.91 | 11.69 ±0.47 | 10.88 ±0.15 | 7.65 ±1.89  | 10.71 ±0.21 | 16.36 ±1.28 |
| Mg     | 0.00        | 0.00        | 0.00        | 0.00        | 10.27 ±0.23 | 0.01 ±0.01  | 0.00        | 0.00 ±0.01  | 0.00        | 10.40 ±0.29 |
| Si     | 31.62 ±0.19 | 32.16 ±0.51 | 32.30 ±0.22 | 32.15 ±0.17 | 18.67 ±0.31 | 29.39 ±0.22 | 33.62 ±0.21 | 32.30 ±1.04 | 33.31 ±0.17 | 20.21 ±1.09 |
| Cu     | 0.37 ±0.02  | 0.16 ±0.01  | 0.87 ±0.05  | 0.14 ±0.01  | 0.37 ±0.01  | 0.48 ±0.03  | 0.15 ±0.02  | 0.82 ±0.04  | 0.25 ±0.02  | 0.25 ±0.02  |
| Ag     | 5.87 ±0.07  | 6.59 ±0.65  | 4.75 ±0.10  | 5.62 ±0.17  | 1.85 ±0.03  | 0.72 ±0.02  | 1.11 ±0.03  | 3.25 ±0.10  | 2.00 ±0.05  | 0.90 ±0.03  |
| Te     | 0.02 ±0.02  | 0.00 ±0.00  | 0.03 ±0.03  | 0.00 ±0.00  | 0.51 ±0.02  | 0.02 ±0.02  | 0.01 ±0.01  | 0.09 ±0.02  | 0.01 ±0.01  | 0.44 ±0.02  |
| Ba     | 8.10 ±0.09  | 7.47 ±0.20  | 7.93 ±0.10  | 8.5 ±0.24   | 8.46 ±0.11  | 8.95 ±0.21  | 8.75 ±0.21  | 9.81 ±0.34  | 8.85 ±0.08  | 8.53 ±0.18  |

| MV20        | MV22        | MV23        | MV23e       | MV24        | MV25        | MV26        | MV27        |
|-------------|-------------|-------------|-------------|-------------|-------------|-------------|-------------|
| 45.48 ±0.52 | 41.31 ±0.47 | 43.26 ±0.55 | 42.22 ±0.65 | 47.40 ±0.36 | 41.69 ±0.43 | 40.86 ±0.33 | 46.43 ±0.44 |
| 19.29 ±0.51 | 18.42 ±0.81 | 10.09 ±1.52 | 12.01 ±0.22 | 9.00 ±1.57  | 16.00 ±0.53 | 15.50 ±0.38 | 9.36 ±0.87  |
| 10.27 ±0.22 | 6.95 ±0.37  | 0.00 ±0.01  | 0.00        | 0.00 ±0.01  | 13.20 ±0.22 | 12.90 ±0.11 | 0.01 ±0.01  |
| 22.82 ±0.29 | 22.40 ±0.27 | 30.05 ±0.41 | 31.40 ±0.16 | 32.90 ±0.68 | 19.13 ±0.13 | 19.40 ±0.17 | 32.61 ±0.51 |
| 0.26 ±0.02  | 0.22 ±0.02  | 1.37 ±0.15  | 0.39 ±0.04  | 0.16 ±0.02  | 0.29 ±0.01  | 0.30 ±0.01  | 0.32 ±0.02  |
| 1.09 ±0.03  | 1.03 ±0.04  | 3.10 ±0.11  | 2.04 ±0.06  | 0.99 ±0.03  | 0.71 ±0.31  | 1.78 ±0.22  | 1.98 ±0.04  |
| 0.27 ±0.03  | 0.52 ±0.02  | 0.74 ±0.10  | 0.07 ±0.04  | 0.01 ±0.01  | 0.01 ±0.01  | 0.02 ±0.02  | 0.04 ±0.02  |
| 0.00 ±0.00  | 8.23 ±0.20  | 9.98 ±0.19  | 9.42 ±0.18  | 9.01 ±0.25  | 8.06 ±0.12  | 7.84 ±0.08  | 7.79 ±0.14  |

| MV28        | MV29        | MV30        | MV31        | MV32        | MV34        | MV34e       | MV35       |
|-------------|-------------|-------------|-------------|-------------|-------------|-------------|------------|
| 40.96 ±0.45 | 42.38 ±0.42 | 44.58 ±0.67 | 45.30 ±0.46 | 44.77 ±0.64 | 43.70 ±0.90 | 39.52 ±0.95 | 41.05 0.30 |
| 16.28 ±0.70 | 17.70 ±0.45 | 19.69 ±0.46 | 18.10 ±0.93 | 18.72 ±1.34 | 11.84 ±0.46 | 10.83 ±0.32 | 17.51 0.38 |
| 9.96 ±0.20  | 10.27 ±0.22 | 10.32 ±0.21 | 10.57 ±0.27 | 11.22 ±0.26 | 0.00 ±0.01  | 0.00        | 7.29 0.34  |
| 20.32 ±0.26 | 19.44 ±0.60 | 20.32 ±0.56 | 22.63 ±0.54 | 23.91 ±0.41 | 25.76 ±1.20 | 30.04 ±0.31 | 20.32 0.11 |
| 0.28 ±0.01  | 0.16 ±0.01  | 0.31 ±0.01  | 0.06 ±0.01  | 0.20 ±0.01  | 1.36 ±0.86  | 0.74 ±0.13  | 0.49 0.01  |
| 2.50 ±0.05  | 0.24 ±0.01  | 3.05 ±0.07  | 2.47 ±0.06  | 0.36 ±0.02  | 6.32 ±0.96  | 7.78 ±0.33  | 2.72 0.05  |
| 0.39 ±0.03  | 0.02 ±0.02  | 0.39 ±0.04  | 0.19 ±0.02  | 0.03 ±0.01  | 0.50 ±0.24  | 0.07 ±0.05  | 0.95 0.06  |
| 8.39 ±0.08  | 8.60 ±0.14  | 0.00 ±0.00  | 0.00 ±0.00  | 0.01 ±0.02  | 9.01 ±0.65  | 8.25 ±0.27  | 8.97 0.19  |

Series 2 - Metal phase:

Average

±StDev

|    | MV37        | MV38        | MV40        | MV41        | MV42        | MV43        | MV45        | MV46        | MV47        |
|----|-------------|-------------|-------------|-------------|-------------|-------------|-------------|-------------|-------------|
| O  | 0.95 ±0.15  | 1.13 ±0.17  | 1.35 ±0.21  | 1.35 ±0.26  | 1.47 ±0.30  | 1.16 ±0.25  | 1.07 ±0.16  | 1.05 ±0.21  | 1.26 ±0.20  |
| Cu | 0.02 ±0.02  | 0.03 ±0.01  | 0.05 ±0.03  | 0.05±0.04   | 0.02 ±0.02  | 0.03 ±0.02  | 0.03 ±0.02  | 0.10 ±0.03  | 0.06 ±0.06  |
| Rh | 0.10 ±0.02  | 0.10 ±0.03  | 0.12 ±0.06  | 0.16 ±0.09  | 0.15 ±0.03  | 0.12 ±0.03  | 0.05 ±0.05  | 0.16 ±0.03  | 0.12 ±0.13  |
| Pd | 0.66 ±0.19  | 0.71 ±0.04  | 0.59 ±0.11  | 0.63 ±0.11  | 0.58 ±0.13  | 0.61 ±0.06  | 0.40±0.16   | 0.64 ±0.08  | 0.88 ±0.28  |
| Ag | 97.48 ±0.33 | 97.38 ±0.49 | 96.48 ±0.75 | 96.39 ±0.75 | 96.37 ±0.85 | 97.24 ±0.25 | 97.55 ±0.66 | 96.62 ±0.44 | 96.57 ±0.33 |
| Au | 0.57 ±0.17  | 0.68 ±0.11  | 0.47 ±0.14  | 0.52 ±0.11  | 0.63 ±0.20  | 0.46 ±0.12  | 0.40 ±0.14  | 0.48 ±0.21  | 0.64 ±0.17  |
| Te | 0.01 ±0.01  | 0.02 ±0.02  | 0.01 ±0.01  | 0.01 ±0.01  | 0.01 ±0.01  | 0.01 ±0.01  | 0.01 ±0.01  | 0.14 ±0.18  | 0.02 ±0.02  |

| MV48        | MV49        | MV50        | MV51        | MV52        | MV53        | MV54        | MV55        | MV56        | MV57        | MV58        |
|-------------|-------------|-------------|-------------|-------------|-------------|-------------|-------------|-------------|-------------|-------------|
| 1.52 ±0.26  | 1.42 ±0.43  | 1.24 ±0.18  | 1.04 ±0.25  | 1.93 ±0.26  | 1.15 ±0.30  | 1.29 ±0.09  | 1.56 ±0.27  | 1.09 ±0.25  | 1.27 ±0.29  | 2.05 ±1.0   |
| 1.76 ±0.26  | 0.76 ±0.58  | 1.71 ±0.40  | 0.14 ±0.06  | 0.13 ±0.02  | 0.08 ±0.04  | 0.07 ±0.05  | 0.05 ±0.04  | 0.38 ±0.15  | 0.21 ±0.07  | 0.03 ±0.02  |
| 0.12 ±0.04  | 0.10 ±0.07  | 0.17 ±0.16  | 0.12 ±0.05  | 0.25 ±0.48  | 0.08 ±0.02  | 0.06 ±0.01  | 0.06 ±0.03  | 0.21 ±0.16  | 0.18 ±0.23  | 0.02 ±0.01  |
| .60 ±0.11   | 0.48 ±0.10  | 0.51 ±0.09  | 0.60 ±0.13  | 0.51 ±0.09  | 0.56 ±0.11  | 0.38 ±0.18  | 0.57 ±0.10  | 0.62 ±0.09  | 0.73 ±0.17  | 0.47 ±0.06  |
| 94.59 ±0.62 | 95.47 ±0.99 | 94.23 ±1.10 | 96.40 ±0.54 | 95.39 ±0.84 | 96.33 ±0.40 | 96.54 ±0.57 | 96.58 ±0.36 | 96.29 ±0.42 | 95.83 ±0.84 | 95.65 ±0.95 |
| 0.60 ±0.12  | 0.39 ±0.16  | 0.38 ±0.15  | 0.55 ±0.13  | 0.46 ±0.14  | 0.62 ±0.27  | 0.21 ±0.13  | 0.45 ±0.21  | 0.62 ±0.15  | 0.59± 0.16  | 0.38 ±0.22  |
| 0.44 ±0.22  | 0.61 ±0.38  | 1.10 ±0.77  | 0.33 ±0.31  | 0.04 ±0.03  | 0.04 ±0.07  | 0.03 ±0.03  | 0.03 ±0.02  | 0.37 ±0.39  | 0.02 ±0.02  | 0.02 ±0.02  |

## Series 2 - Slag phase:

Average

±StDev

|    | MV37        | MV38        | MV40        | MV41        | MV42        | MV43        | MV45        | MV46        | MV47        |
|----|-------------|-------------|-------------|-------------|-------------|-------------|-------------|-------------|-------------|
| O  | 43.43 ±0.56 | 42.81 ±0.50 | 40.75 ±0.51 | 39.91 ±0.65 | 41.87 ±0.52 | 43.65 ±0.51 | 41.35 ±0.55 | 45.21 ±0.82 | 40.24 ±0.56 |
| Na | 11.07 0.37± | 11.51 ±0.21 | 16.97 ±0.19 | 17.27 ±0.26 | 19.52 ±0.23 | 18.81 ±0.84 | 11.05 ±0.20 | 10.04 ±0.35 | 16.18 ±0.21 |
| Mg | 0.01 ±0.01  | 0.01 ±0.02  | 9.60 ±0.15  | 9.97 ±0.17  | 10.48 ±0.17 | 10.49 ±0.22 | 0.00 ±0.00  | 0.01 ±0.01  | 12.68 ±0.13 |
| Si | 29.81 ±0.22 | 30.36 ±0.23 | 19.67 ±0.17 | 20.24 ±0.16 | 23.11 ±0.15 | 23.30 ±0.30 | 27.33 ±0.28 | 32.61 ±0.66 | 19.1 ±0.25  |
| Cu | 0.57 ±0.02  | 0.42 ±0.02  | 0.35 ±0.01  | 0.31 ±0.01  | 0.09 ±0.01  | 0.44 ±0.01  | 1.74 ±0.12  | 0.39 ±0.04  | 0.31 ±0.01  |
| Ag | 6.82 ±0.18  | 4.49 ±0.07  | 2.40 ±0.07  | 1.96 ±0.05  | 3.09 ±0.06  | 2.53 ±0.05  | 8.37 ±0.54  | 2.38 ±0.34  | 2.01 ±0.14  |
| Te | 0.14 ±0.02  | 0.06 ±0.04  | 0.45 ±0.02  | 0.35 ±0.01  | 0.23 ±0.01  | 0.31 ±0.02  | 0.74 ±0.14  | 0.07 ±0.05  | 0.04 ±0.02  |
| Ba | 7.06 ±0.36  | 8.84± 0.18  | 8.31 ±0.12  | 8.86 ±0.08  | 0.00 ±0.00  | 0.00 ±0.00  | 8.96 ±0.50  | 7.87 ±0.57  | 8.29 ±0.12  |

| MV48        | MV49        | MV50        | MV51        | MV52        | MV53        | MV54        | MV55        | MV56        | MV57        | MV58        |
|-------------|-------------|-------------|-------------|-------------|-------------|-------------|-------------|-------------|-------------|-------------|
| 44.61 ±0.36 | 40.17 ±0.40 | 43.51 ±0.41 | 43.29 ±0.71 | 38.95 ±0.48 | 43.66 ±0.55 | 41.29 ±0.79 | 39.43 ±0.78 | 44.16 ±0.50 | 40.60± 0.87 | 37.46 ±0.59 |
| 11.91 ±0.29 | 17.90 ±0.19 | 20.19 ±0.26 | 11.41 ±0.39 | 18.04 ±0.13 | 19.91 ±0.40 | 12.13 ±0.19 | 18.35 ±0.27 | 10.91 ±0.20 | 16.95 ±0.25 | 17.00 ±0.29 |
| 0.02 ±0.05  | 10.27 ±0.16 | 10.73 ±0.17 | 0.00 ±0.00  | 10.42 ±0.10 | 10.33 ±0.25 | 0.03 ±0.07  | 7.19 ±0.23  | 0.01 ±0.01  | 13.41 ±0.12 | 7.13 ±0.36  |
| 31.08 ±0.34 | 21.07 ±0.11 | 23.27 ±0.19 | 31.52 ±0.76 | 21.43 ±0.24 | 23.76 ±0.13 | 31.42 ±1.14 | 22.14 ±0.28 | 33.08 ±0.48 | 19.50 ±0.13 | 22.09 ±0.46 |
| 0.37 ±0.11  | 0.20 ±0.02  | 0.46 ±0.01  | 0.76 ±0.20  | 0.30 ±0.01  | 0.24 ±0.01  | 0.57 ±0.64  | 0.43 ±0.02  | 0.32 ±0.02  | 0.23 ±0.01  | 0.58 ±0.03  |
| 0.95 ±0.11  | 0.25 ±0.01  | 0.31 ±0.01  | 2.85 ±0.28  | 0.87 ±0.07  | 1.16 ±0.05  | 2.18 ±0.36  | 1.18 ±0.03  | 1.31 ±0.11  | 0.54 ±0.07  | 2.88 ±0.04  |
| 0.07 ±0.03  | 0.03 ±0.01  | 0.03 ±0.02  | 0.11 ±0.06  | 0.40 ±0.06  | 0.23 ±0.02  | 0.49 ±0.36  | 0.86 ±0.03  | 0.02 ±0.01  | 0.00 ±0.00  | 0.82 ±0.03  |
| 9.5 ±0.37   | 8.81 ±0.07  | 0.00 ±0.01  | 9.07 ±0.45  | 8.05 ±0.11  | 0.00 ±0.00  | 10.42 ±0.14 | 9.10 ±0.19  | 8.73 ±0.42  | 6.63 ±0.06  | 9.47 ±0.18  |
